# Supplementary material for: Investigation of the surface passivation mechanism through an Ag-doped Al-rich film using a solution process
Source: Royal Society of Chemistry journal article supplement (doi:10.1039/c5nr06883e), 2015-12-14
Supplement: c5nr06883e1.pdf [file c5nr06883e1.pdf]

†Electronic Supplementary Information (ESI) for Nanoscale

This journal is © The Royal Society of Chemistry 2015

### **Supporting information for**

## **Investigation of surface passivation mechanism through Ag-doped Al-rich film using solution processes**

Firoz Khan, Seong-Ho Baek, and Jae Hyun Kim\*

Division of Nano and Energy Convergence Research, Daegu Gyeongbuk Institute of Science & Technology (DGIST), 50-1 Sang-Ri, Hyeonpung-Myeon, Dalseong-gun, Daegu 711-873, Republic of Korea

#### **AUTHOR INFORMATION**

#### **Corresponding Author**

\* E-mail: [jaehyun@dgist.ac.kr](mailto:jaehyun@dgist.ac.kr).

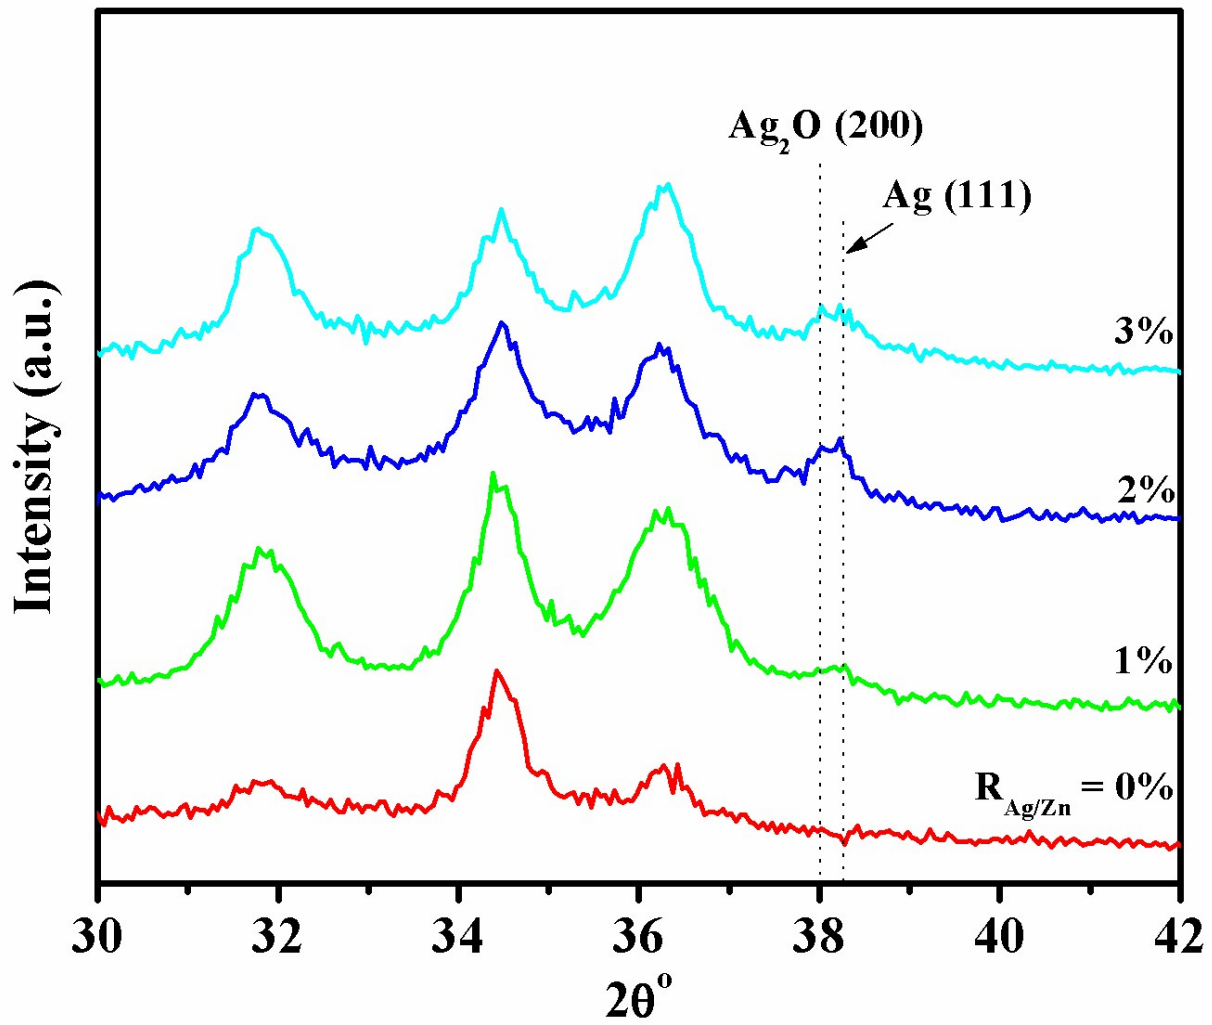

Figure S1. XRD spectra of ZnO:Al:Ag film in  $2\theta$  range of 30 to  $42^\circ$  coated on n-Si and annealed in forming gas.

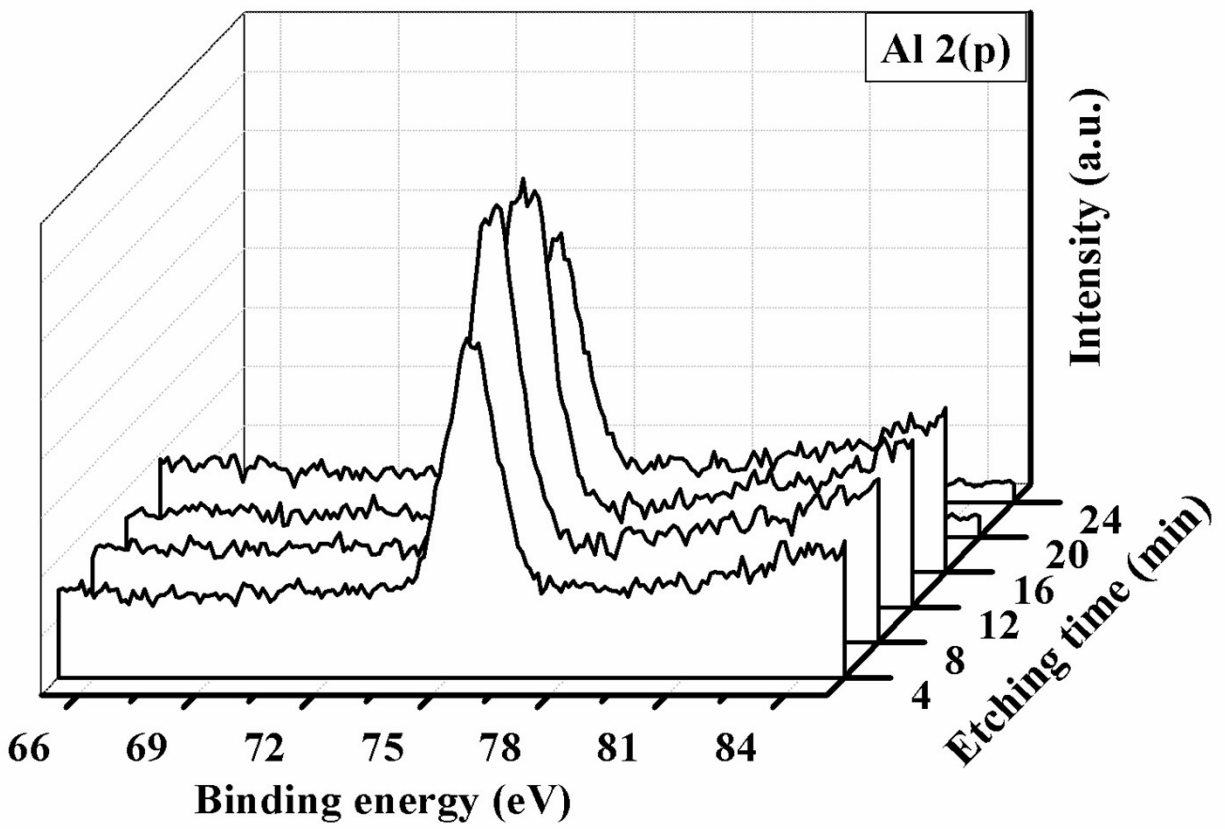

**Figure S2.** XPS spectra of a montage display of Al 2p with etching time.

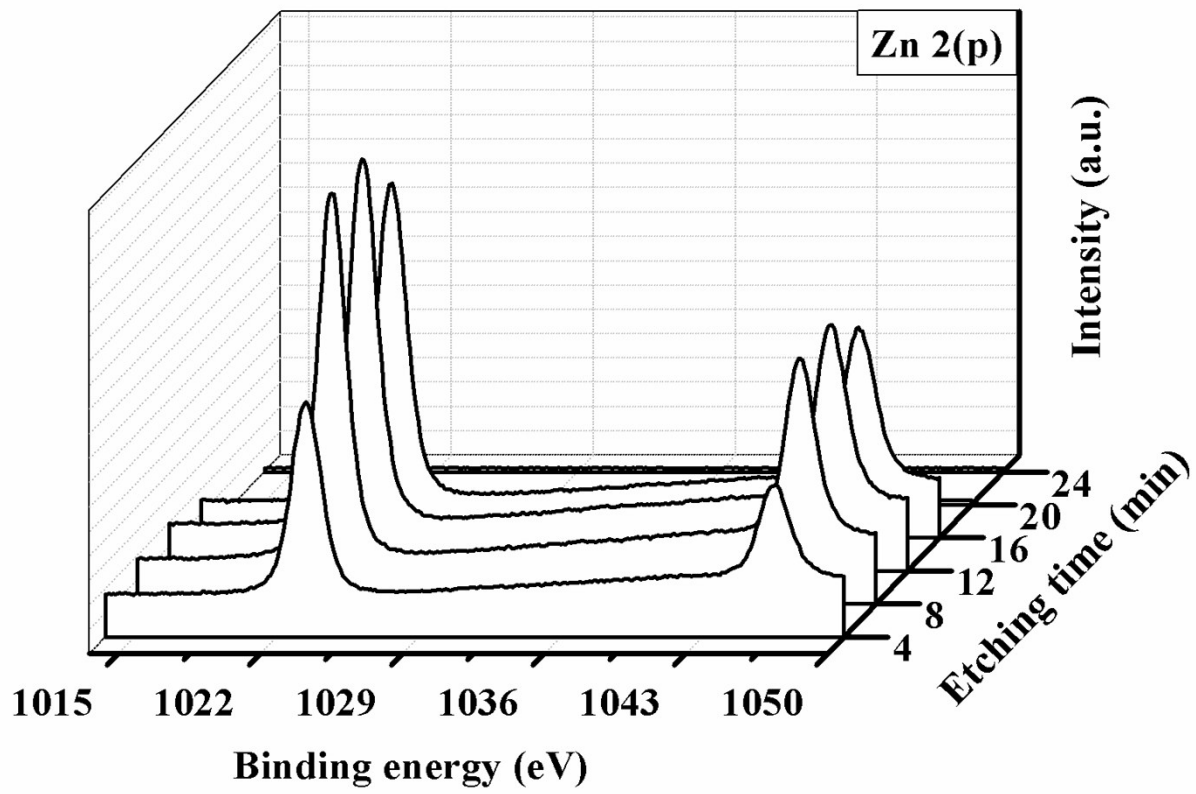

**Figure S3.** XPS spectra of a montage display of Zn 2p with etching time.

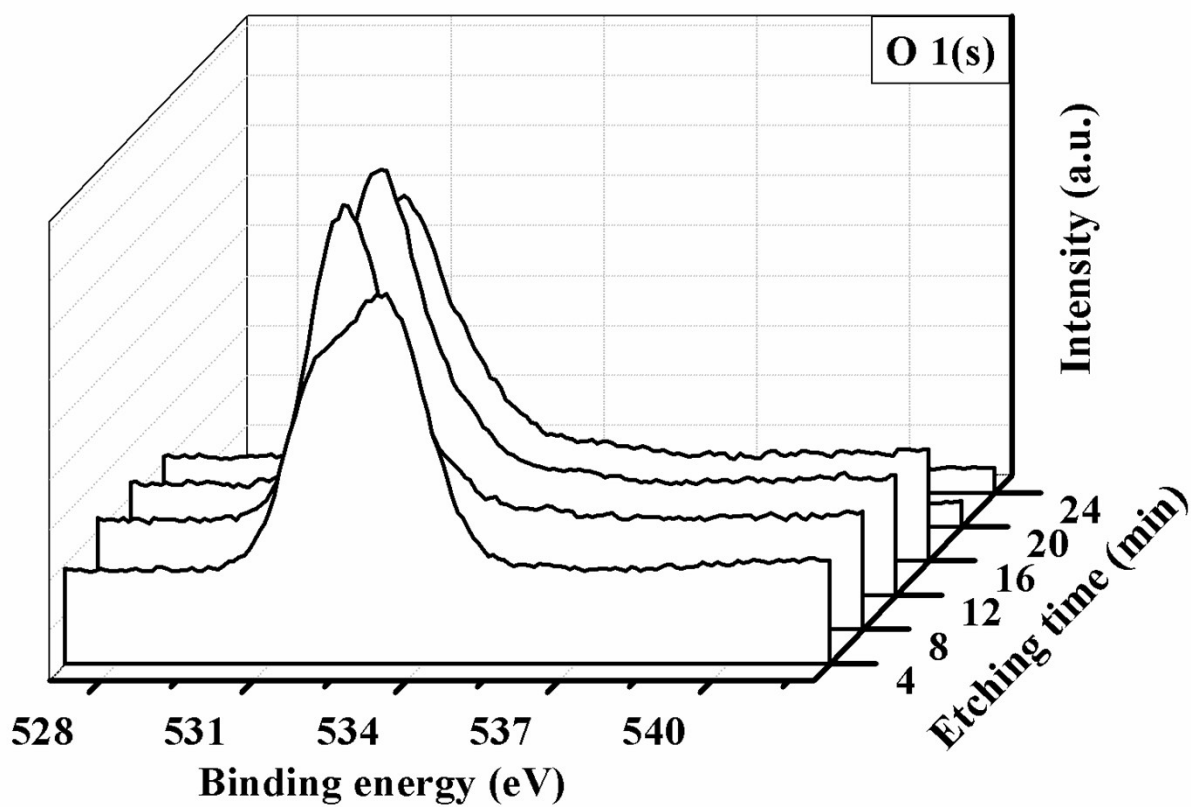

Figure S4. XPS spectra of a montage display of O 1s with etching time.

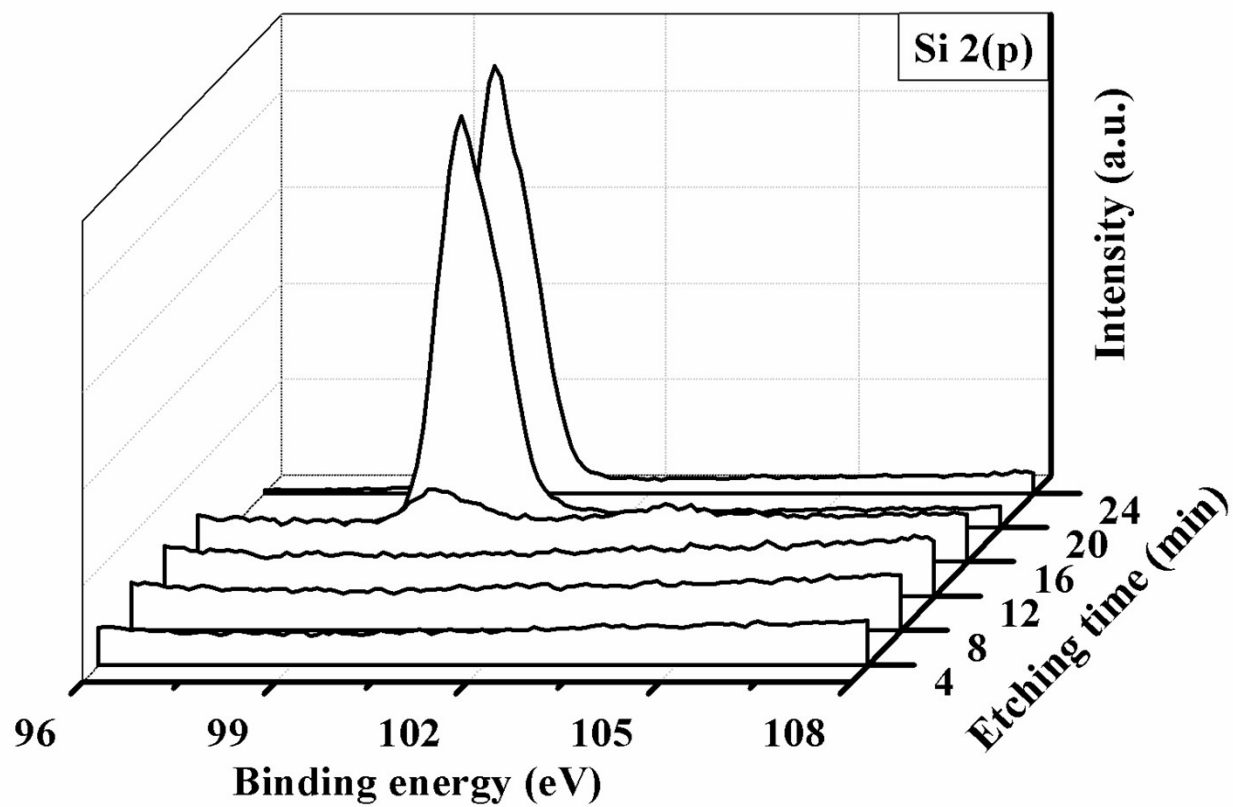

Figure S5. XPS spectra of a montage display of Si 2p with etching time.

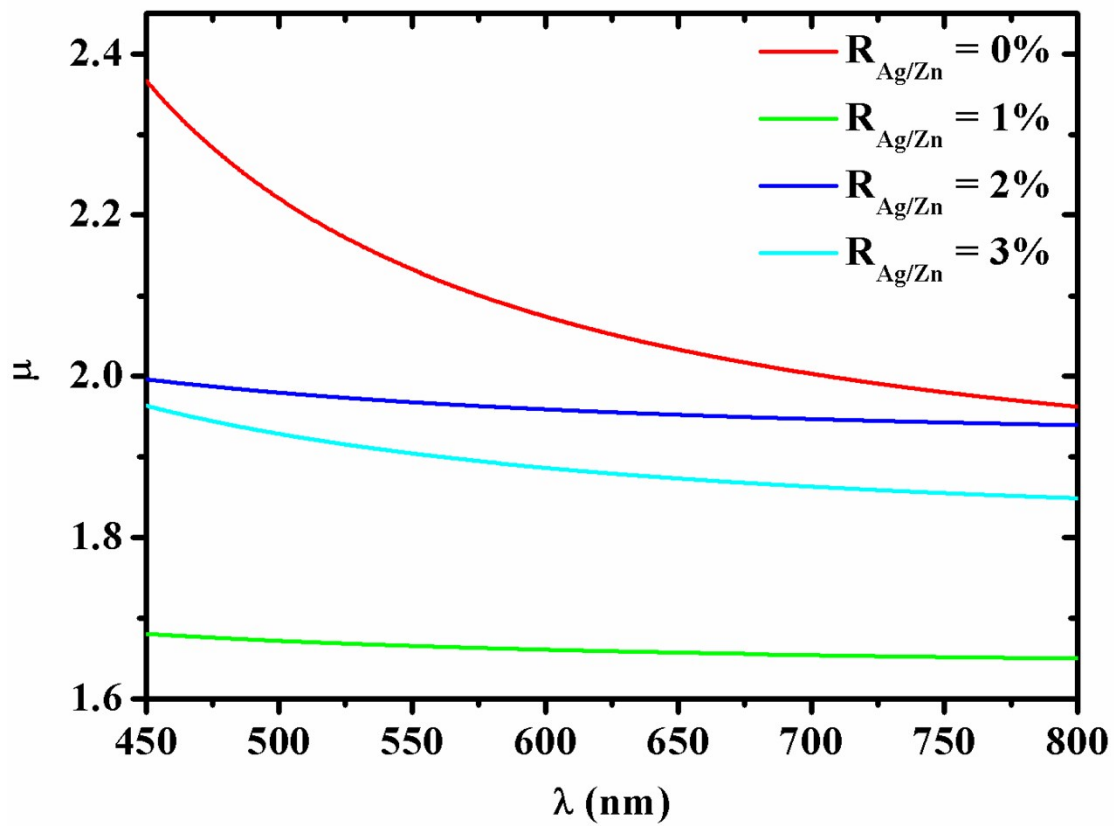

Figure S6. Refractive index of ZnO:Al:Ag films coated on polished Si.

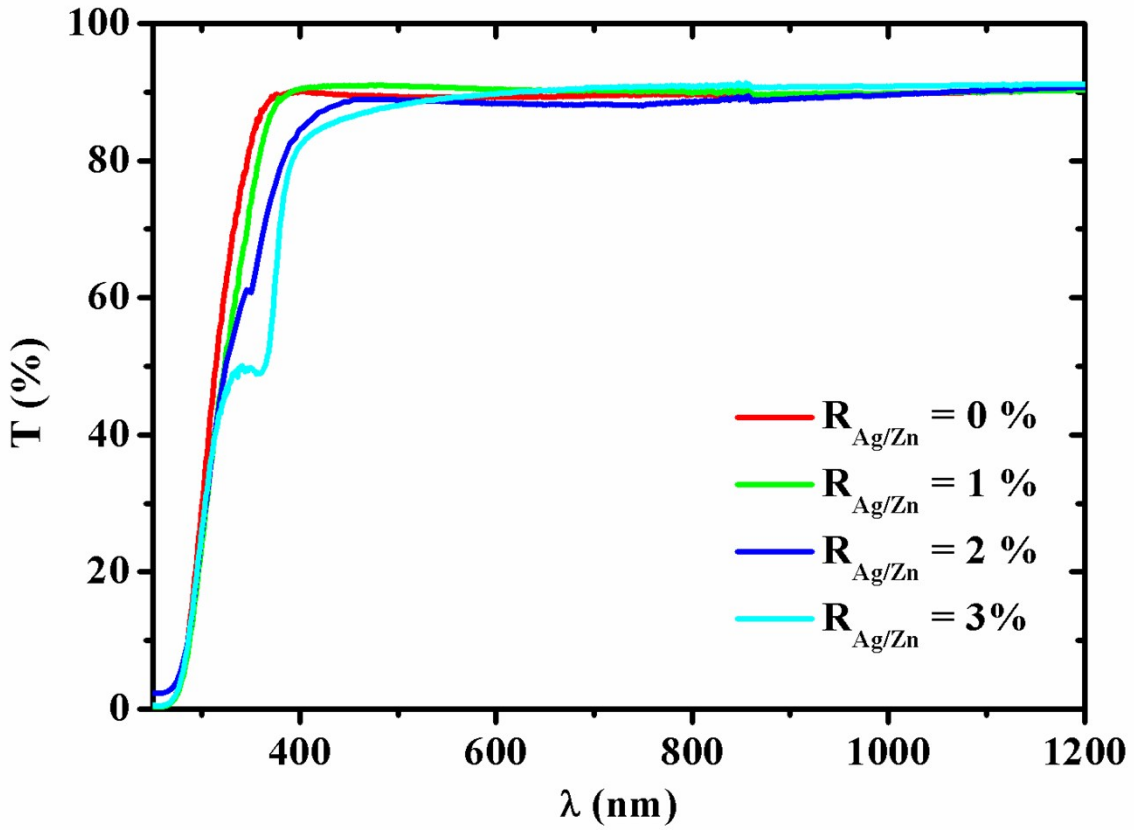

Figure S7. Transmittance spectra of ZnO:Al:Ag films coated on glass for various  $R_{Ag/Zn}$ .
